# Supplementary material
Source: PubMed Central journal article supplement (PMC7378965)
Supplement: NIHMS1595213-supplement-supp_TableS1.pdf [file NIHMS1595213-supplement-supp_TableS1.pdf]

## Table S1: Overview of morphine PK population models

### Covariate Usage

|                     | Holford <sup>4</sup>                                                                                                            | Anand                   | Knibbe  | Wang1         | Wang2         | Knosgaard <sup>4</sup> |
|---------------------|---------------------------------------------------------------------------------------------------------------------------------|-------------------------|---------|---------------|---------------|------------------------|
| Pub.                | 2012                                                                                                                            | 2008                    | 2009    | 2013          | 2013          | 2016                   |
| Comp                | 2                                                                                                                               | 1                       | 2       | 2             | 2             | 1                      |
| Type                | Mechanistic                                                                                                                     | Mechanistic             | Empiric | Empiric (BDE) | Empiric (BDE) | Mechanistic            |
| Output <sup>3</sup> | M, M3G, M6G                                                                                                                     | M                       | M       | M             | M, M3G        | M, M3G, M6G            |
| CL                  | Bw, Pma, F <sup>1</sup>                                                                                                         | Bw, Pma, F <sup>1</sup> | Bw      | Bw            | Bw            | Bw, Pma                |
| V1                  | Bw, Pna, F <sup>2</sup>                                                                                                         | Bw, Pna, F <sup>2</sup> | Bw      | Bw            | Bw            | Bw                     |
| Q                   | Bw                                                                                                                              | -                       | -       | Bw            | Bw            | -                      |
| V2                  | Bw, Pna, F <sup>2</sup>                                                                                                         | -                       | Bw      | Bw            | Bw            | -                      |
| CL <sub>MxG</sub>   | Bw, Pna                                                                                                                         | -                       | -       | -             | Bw            | Bw, Pna                |
| V <sub>MxG</sub>    | Bw, Pna                                                                                                                         | -                       | -       | -             | Bw            | Bw, Pna                |
|                     | <sup>1</sup> Also includes a group factor (FDEVCL) modeling the effect of mechanical ventilation                                |                         |         |               |               |                        |
|                     | <sup>2</sup> Also includes a group factor (FDEVV) discriminating between preterm and term neonates                              |                         |         |               |               |                        |
|                     | <sup>3</sup> MxG levels can only be simulated if the following parameters are given: fm, CL <sub>MxG</sub> and V <sub>MxG</sub> |                         |         |               |               |                        |
|                     | <sup>4</sup> Uses the Bouwmeester (2004) metabolite model                                                                       |                         |         |               |               |                        |

### Symbols

|                   |                                               |
|-------------------|-----------------------------------------------|
| Bw                | Bodyweight                                    |
| Pma               | Post meanstrual age                           |
| Pna               | Post natal age                                |
| BDE               | Bodyweight dependent exponent                 |
| M                 | Morphine concentration                        |
| M3G               | Morphine-3-glucuronide concentration          |
| M6G               | Morphine-6-glucuronide concentration          |
| CL                | Morphine elimination clearance                |
| V1                | Morphine volume of central compartment        |
| Q                 | Morphine distribution clearance               |
| V2                | Morphine volume of peripheral compartment     |
| CL <sub>MxG</sub> | Morphine-x-glucuronide elimination clearance  |
| V <sub>MxG</sub>  | Morphine-x-glucuronide volume of distribution |

**Table S1. Modeling details in terms of model structure, tasks and validation.**

The defined PKPD models consist of the following sub-models:

- A1) Structural model (number of compartments, routes of administration and routes of elimination)
- A2) Error model (uncertainty of PK parameters as described by its statistical distribution)
- A3) Covariate model (modulation of PK parameters by physiological patient variables)

The PK model can be used for the following tasks:

- B1) Simulation: Prediction of concentration for a given set of parameters and dosage regimen.
- B2) Fitting: Estimation of parameters for a given set of concentrations (observations) and dosage regimen(s).
- B3) Dose calculation: estimation of a dosage regimen for given set of exposure targets and parameters.

The correctness of a PKPD model can be established using two types of validation which respect to B1, B2 and B3.

- C1) Model performance in clinical practice (predictive performance).
- C2) General correctness of the PKPD modeling software (comparative performance).
- C3) Correctness of the implementation of a particular model in a software application.

The C1 validation is performed by the authors presenting their model(s) in their papers. It is our concern, but was not reanalyzed.

The C2 validation is performed by the manufacturer. The correctness of the Edsim++ PK-Engine used for representing PKPD models in NeoRelief with respect to model aspects A1 and A2 has been extensively tested by the manufacturer of the Edsim++ software. This was done by implementing identical models in different software packages and comparing results/output of tasks B1, B2 and B3. In this project the Edsim++ PK engine was compared with MwPharm DOS, Berkeley Madonna and R (RxODE package).

For this project we performed C3 validation for covariate model aspects (A3). We checked the correctness of the effect of covariate values on PK parameter estimates. This was accomplished by implementing the mathematical description of the covariate model in two different software platforms. The covariate model as implemented in the NeoRelief PK-engine was compared with the covariate model implemented as simple equations in MS Excel. This will identify any coding errors, but not interpretation errors.
