# Supplementary material
Source: PubMed Central journal article supplement (PMC7378965)
Supplement: NIHMS1595213-supplement-supp_TableS3b.pdf [file NIHMS1595213-supplement-supp_TableS3b.pdf]

Table S3

## Comparison of results from worksheet functions versus NeoRelief model output

| <i>Total Morphine Clearance</i> |        |      |      |      | Holford      |             | Anand        |             |                | Knibbe       |             |                | Wang1        |             | Wang2        |             | Knosgaard    |             |
|---------------------------------|--------|------|------|------|--------------|-------------|--------------|-------------|----------------|--------------|-------------|----------------|--------------|-------------|--------------|-------------|--------------|-------------|
| Patient                         | Age    | Unit | Bw   | Term | <i>Excel</i> | <i>NeoR</i> | <i>Excel</i> | <i>NeoR</i> | <i>Krekels</i> | <i>Excel</i> | <i>NeoR</i> | <i>Krekels</i> | <i>Excel</i> | <i>NeoR</i> | <i>Excel</i> | <i>NeoR</i> | <i>Excel</i> | <i>NeoR</i> |
|                                 |        |      |      |      | CL           | CL          | CL           | CL          | CL             | CL           | CL          | CL             | CL           | CL          | CL           | CL          | CL           | CL          |
|                                 |        |      | (kg) | (wk) | ml/min       | ml/min      | ml/min       | ml/min      | ml/min         | ml/min       | ml/min      | ml/min         | ml/min       | ml/min      | ml/min       | ml/min      | ml/min       | ml/min      |
| PT1D                            | 1day   |      | 0.5  | 32   | 1.89         | 1.89        | 2.40         | 2.40        | 2.37           | 1.44         | 1.44        | 1.44           | 1.13         | 1.13        | 1.18         | 1.18        | 1.78         | 1.78        |
| PT2W                            | 2weeks |      | 1    | 34   | 4.52         | 4.52        | 5.92         | 5.92        | 4.90           | 9.29         | 9.29        | 9.29           | 3.15         | 3.15        | 3.11         | 3.11        | 4.40         | 4.4         |
| FT1D                            | 1day   |      | 3.5  | 38   | 27.63        | 27.63       | 29.89        | 29.89       | 29.50          | 23.72        | 23.72       | 23.7           | 36.65        | 36.65       | 38.22        | 38.22       | 22.19        | 22.19       |
| FT2W                            | 2weeks |      | 4    | 40   | 40.12        | 40.12       | 44.12        | 44.12       | 38.20          | 68.39        | 68.39       | 68.4           | 55.83        | 55.83       | 56.02        | 56.02       | 32.75        | 32.75       |
| IN3M                            | 3month |      | 6    | 40   | 95.63        | 95.63       | 106.46       | 106.46      | 98.00          | 122.62       | 122.62      | 123            | 153.44       | 153.44      | 146.22       | 146.22      | 79.02        | 79.02       |
| IN6M                            | 6month |      | 7.5  | 40   | 165.39       | 165.39      | 180.05       | 180.05      | 173.00         | 169.08       | 169.08      | 169            | 211.75       | 211.75      | 207.72       | 207.72      | 133.65       | 133.65      |
| IN1Y                            | 1year  |      | 10   | 40   | 280.81       | 280.81      | 289.93       | 289.93      | 287.00         | 255.87       | 255.87      | 256            | 287.49       | 287.49      | 292.00       | 292.00      | 215.21       | 215.21      |
| IN2Y                            | 2year  |      | 13   | 40   | 392.29       | 392.29      | 388.65       | 388.65      | 388.00         | 373.33       | 373.33      | 373            | 366.63       | 366.63      | 379.09       | 379.09      | 288.49       | 288.49      |
| IN3Y                            | 3year  |      | 17   | 40   | 491.90       | 491.90      | 482.39       | 482.39      | 482.00         | 549.37       | 549.37      | 549            | 465.76       | 465.76      | 486.29       | 486.29      | 358.07       | 358.07      |

Results for nine case examples are presented: 32 week preterm neonate (PT1D); 32 week preterm neonates (PT2W); 38 week term neonate (FT1D); 40 week term neonate (FT2W); 3 month old infant born term (IN3M); 6 month old infant (IN6M); one year old infant (IN1Y); 2 year old infant (IN2Y); and 3 year old infant (IN3Y) .
